# Supplementary material for: MicroRNA-873 inhibits colorectal cancer metastasis by targeting ELK1 and STRN4
Source: PubMed Central journal article supplement (PMC6609243; doi:10.18632/oncotarget.24115), 2018-01-02
Supplement: oncotarget-10-4192-s001.pdf [file oncotarget-10-4192-s001.pdf]

## MicroRNA-873 inhibits colorectal cancer metastasis by targeting ELK1 and STRN4

### SUPPLEMENTARY MATERIALS

**Supplementary Table 1: Primer sequences for plasmid construction**

|                 |    |                                           |
|-----------------|----|-------------------------------------------|
| pre-miR-873     | Fw | AGTGTCTGGGATGCCACAA                       |
|                 | Rv | TGAGTGGACAAGTTAACCCCTTGC                  |
| CDK6 3'UTR      | Fw | ATACTCATCTAGGCTGTGTGAACC                  |
|                 | Rv | GTGTGGCCTGTAGATGGAGAGA                    |
| ELK1 3'UTR      | Fw | ATGTCCCTGGAGTTGGGAGG                      |
|                 | Rv | CACAGCTTCCACGTCTCTGAC                     |
| LEF1 3'UTR      | Fw | CCTTGTAAGGTGTTTCAGTAGAGCT                 |
|                 | Rv | CACTCCCATCTGAATCCTGGC                     |
| MyO1B 3'UTR     | Fw | GGTGATTGGTACAGGGTGCC                      |
|                 | Rv | CTGAGAGATGATACATTGACACACAAC               |
| STRN4 3'UTR     | Fw | AGGGATTGCCCAACTCCT                        |
|                 | Rv | TTTACATACAAGATGGGGACAGA                   |
| WASF2 3'UTR     | Fw | GTGTTTCAGGATGCACCACCA                     |
|                 | Rv | AGGCTGGTCCCAAGGCTATG                      |
| ELK1 CDS        | Fw | ATGGACCCATCTGTGACGC                       |
|                 | Rv | TCATGGCTTCTGGGGCC                         |
| STRN4 CDS       | Fw | ATGATGGAGGAGCGAGCG                        |
|                 | Rv | TCATACGAAGACCTTGCCA                       |
| ELK1 3'UTR mut  | Fw | ATTCAAGGACTAAATATATATTTTTCAAAGTGATGCTGGAG |
|                 | Rv | CTTTAGTCCTTGAATTCCCCATTCTCTGGGACTC        |
| STRN4 3'UTR mut | Fw | CAGCAAGGACATTATAAGCCCCAACCCCTCTG          |
|                 | Rv | TATAATGTCCTTGCTGGAAGGGGACCGAGGG           |

**Supplementary Table 2: Primer sequences for qRT-PCR analysis**

---

|              |    |                                                        |
|--------------|----|--------------------------------------------------------|
| miR-873 RT   |    | TCGTATCCAGTGCGTGTCTGGAGTCGGCAATTGCACTGGATACGACT AGGAGA |
| U6 RT        |    | CGCTTACGAATTTGCGTGTCAT                                 |
| miR-873 qPCR | Fw | GGGGGCAGGAACCTGTGAG                                    |
|              | Rv | TGCGTGTCTGGAGTC                                        |
| U6 qPCR      | Fw | GCTTCGGCAGCACATATACTAAAAT                              |
|              | Rv | CGCTTACGAATTTGCGTGTCAT                                 |
| CDK6         | Fw | TGCACAGTGTACGAACAGACA                                  |
|              | Rv | ACCTCGGAGAAGCTGAAACATCA                                |
| ELK1         | Fw | CTTCTGGAGCACCTGAGTCC                                   |
|              | Rv | GAGAGCATGGATGGAGTGACC                                  |
| LEF1         | Fw | TGTTTATCCCATCACGGGTGG                                  |
|              | Rv | CATGGAAGTGTGCGCTGACAG                                  |
| Myo1B        | Fw | AGGTCTGGTGTGGAGGTCCTAT                                 |
|              | Rv | GCGTTGCTTCCTCAGGTCTTC                                  |
| STRN4        | Fw | GGGAGTCGCTGCTGGTGAAA                                   |
|              | Rv | ATCGTCCTCGTCGCTGTCTTC                                  |
| WASF2        | Fw | CAAGACACGTAAGGAAGAGTGGG                                |
|              | Rv | CACTGGGTAACTGAATTCTGCTGG                               |
| GAPDH        | Fw | GGTCTCCTCTGACTTCAACA                                   |
|              | Rv | GTGAGGGTCTCTCTTCT                                      |

---
